# Supplementary material
Source: publisher figshare collection journal article supplement (https://tandf.figshare.com/articles/dataset/_/19616023)
Supplement: Supplementary file 1 [file 1]

**Supplemental Data Three.** Partial Spearman’s correlations controlling for T1 depression, anxiety, and loneliness.

|  | 1 | 2 | 3 | 4 | 5 |
| --- | --- | --- | --- | --- | --- |
| 1. PHQ-2 | - | - | - | - | - |
| 1. GAD-2 | .56*** | - | - | - | - |
| 1. UCLA-3 | .35*** | .28* | - | - | - |
| 1. Age | -.28* | -.21* | .01 | - | - |
| 1. Gender | -.05 | -.04 | -.02 | - | - |

*Note. *p <.05, **p<.01, *** p<.001. Where PHQ-2 = Patient Health Questionnaire; GAD-2 = Generalized Anxiety Disorder; Loneliness = 3-Item Loneliness Scale.*
